# Supplementary material for: Effect of BIM expression on the prognostic value of PD-L1 in advanced non-small cell lung cancer patients treated with EGFR-TKIs
Source: PubMed Central journal article supplement (PMC9998621; doi:10.1038/s41598-023-30565-4), 2023-03-09
Supplement: 41598_2023_30565_MOESM1_ESM.pdf [file 41598_2023_30565_MOESM1_ESM.pdf]

## Effect of BIM expression on the prognostic value of PD-L1 in advanced non-small cell lung cancer patients treated with EGFR-TKIs

Chang-Yao Chu<sup>1#</sup>, Chien-Yu Lin<sup>2#</sup>, Chien-Chung Lin<sup>2, 3, 4#</sup>, Chien-Feng Li<sup>5-7</sup>, Shang-Yin Wu<sup>8</sup>, Jeng-Shiuan Tsai<sup>2</sup>, Szu-Chun Yang<sup>2</sup>, Chian-Wei Chen<sup>2</sup>, Chia-Yin Lin<sup>9</sup>, Chao-Chun Chang<sup>10</sup>, Yi-Ting Yen<sup>10</sup>, Yau-Lin Tseng<sup>10</sup>, Po-Lan Su<sup>2\*</sup>, and Wu-Chou Su<sup>3, 8, 11</sup>

**Supplementary Table 1.** Cox proportional hazards regression analysis of progression-free survival among patients who received first-generation EGFR-TKI

|                         |                             | HR (95% CI)      | P-value |
|-------------------------|-----------------------------|------------------|---------|
| <b>Age (years)</b>      | > 65 years vs. < 65 years   | 1.12 (0.58–2.14) | 0.745   |
| <b>Sex</b>              | Male vs. Female             | 1.31 (0.72–2.39) | 0.375   |
| <b>Brain metastasis</b> | Presence vs. Absence        | 3.12 (1.52–6.38) | 0.002   |
| <b>EGFR mutation</b>    | Exon 19 deletion vs. Others | 1.00 (0.50–1.99) | 0.996   |
| <b>PD-L1 level</b>      | ≥ 1% vs. < 1%               | 0.87 (0.46–1.63) | 0.665   |
| <b>E-cadherin</b>       | Loss vs. preserved          | 1.37 (0.62–3.03) | 0.433   |
| <b>MET</b>              | Presence vs. absence        | 1.40 (0.76–2.58) | 0.282   |
| <b>p-STAT3</b>          | Presence vs. absence        | 0.64 (0.31–1.32) | 0.226   |
| <b>p-AKT</b>            | Presence vs. absence        | 1.15 (0.58–2.27) | 0.694   |
| <b>BIM</b>              | Presence vs. absence        | 2.28 (0.93–5.58) | 0.070   |

EGFR, epidermal growth factor receptor; TKI, tyrosine kinase inhibitor

**Supplementary Table 2.** Cox proportional hazards regression analysis of progression-free survival among patients who received second-generation EGFR-TKI

|                         |                             | <b>HR (95% CI)</b> | <b>P-value</b> |
|-------------------------|-----------------------------|--------------------|----------------|
| <b>Age (years)</b>      | > 65 years vs. < 65 years   | 1.35 (0.49–3.70)   | 0.561          |
| <b>Sex</b>              | Male vs. Female             | 0.51 (0.22–1.21)   | 0.127          |
| <b>Brain metastasis</b> | Presence vs. Absence        | 0.89 (0.36–2.18)   | 0.798          |
| <b>EGFR mutation</b>    | Exon 19 deletion vs. Others | 0.78 (0.33–1.88)   | 0.580          |
| <b>PD-L1 level</b>      | ≥ 1% vs. < 1%               | 1.07 (0.45–2.54)   | 0.877          |
| <b>E-cadherin</b>       | Loss vs. preserved          | 1.20 (0.35–4.08)   | 0.767          |
| <b>MET</b>              | Presence vs. absence        | 0.38 (0.15–0.99)   | 0.049          |
| <b>p-STAT3</b>          | Presence vs. absence        | 0.91 (0.41–2.06)   | 0.825          |
| <b>p-AKT</b>            | Presence vs. absence        | 1.03 (0.41–2.57)   | 0.949          |
| <b>BIM</b>              | Presence vs. absence        | 13.73 (2.62–72.02) | 0.002          |

EGFR, epidermal growth factor receptor; TKI, tyrosine kinase inhibitor

**Supplementary Table 3.** Association between BIM protein expression and genotyping

|                                | <b>BIM wild-type<br/>(n = 32)</b> | <b>BIM deletion polymorphism<br/>(n = 4)</b> |
|--------------------------------|-----------------------------------|----------------------------------------------|
| <b>Positive BIM expression</b> | 27                                | 4                                            |
| <b>Negative BIM expression</b> | 5                                 | 0                                            |

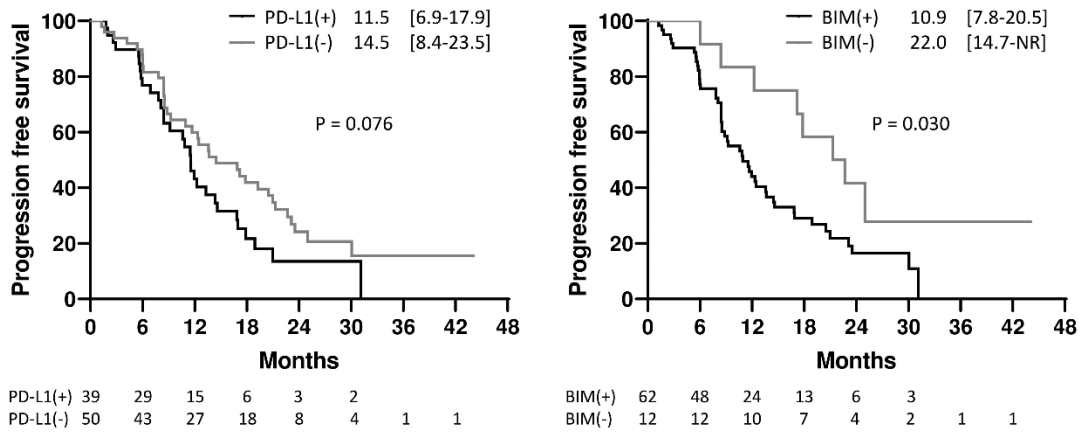

**Supplementary Figure 1.** Kaplan–Meier analysis of progression-free survival among patients who received first-generation EGFR-TKIs and had different expression levels of PD-L1 (A) and BIM (B).

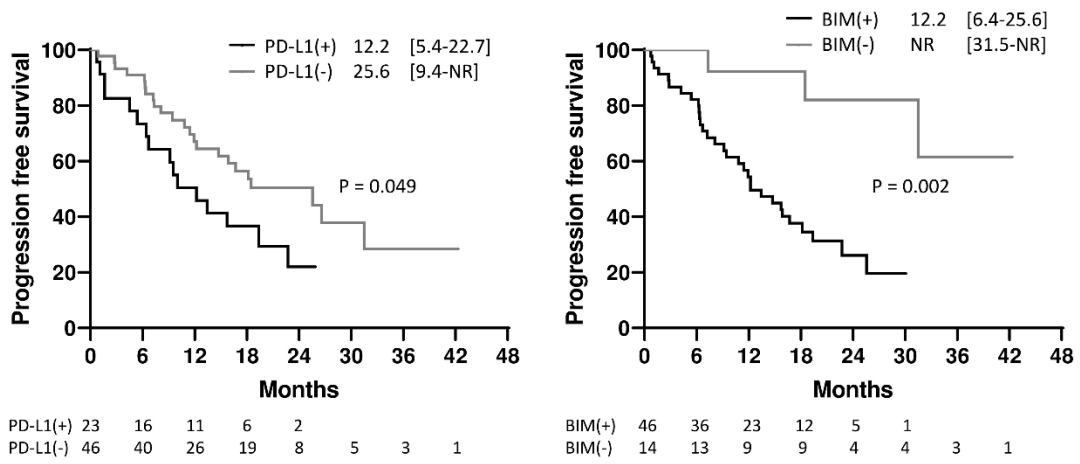

**Supplementary Figure 2.** Kaplan–Meier analysis of progression-free survival among patients who received second-generation EGFR-TKIs and had different expression levels of PD-L1 (A) and BIM (B).

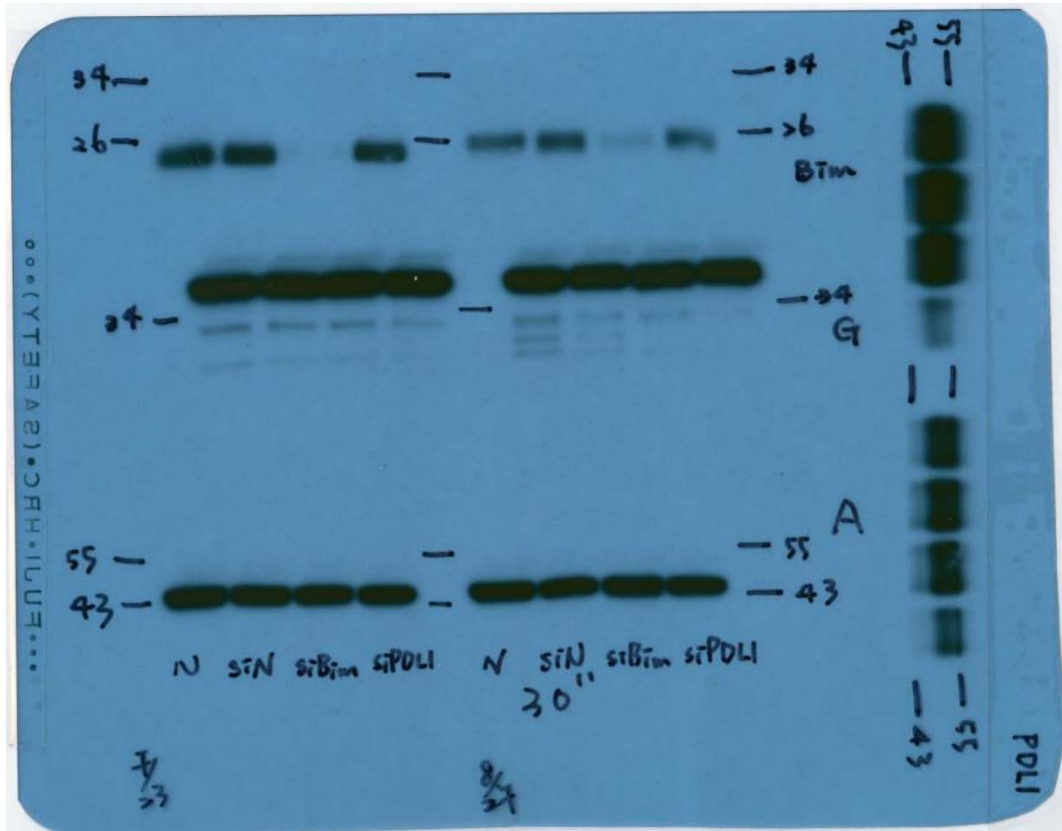

**Supplementary Figure 3.** The original blots of HCC827 cells with transfection of siRNA targeting PD-L1 and BIM.

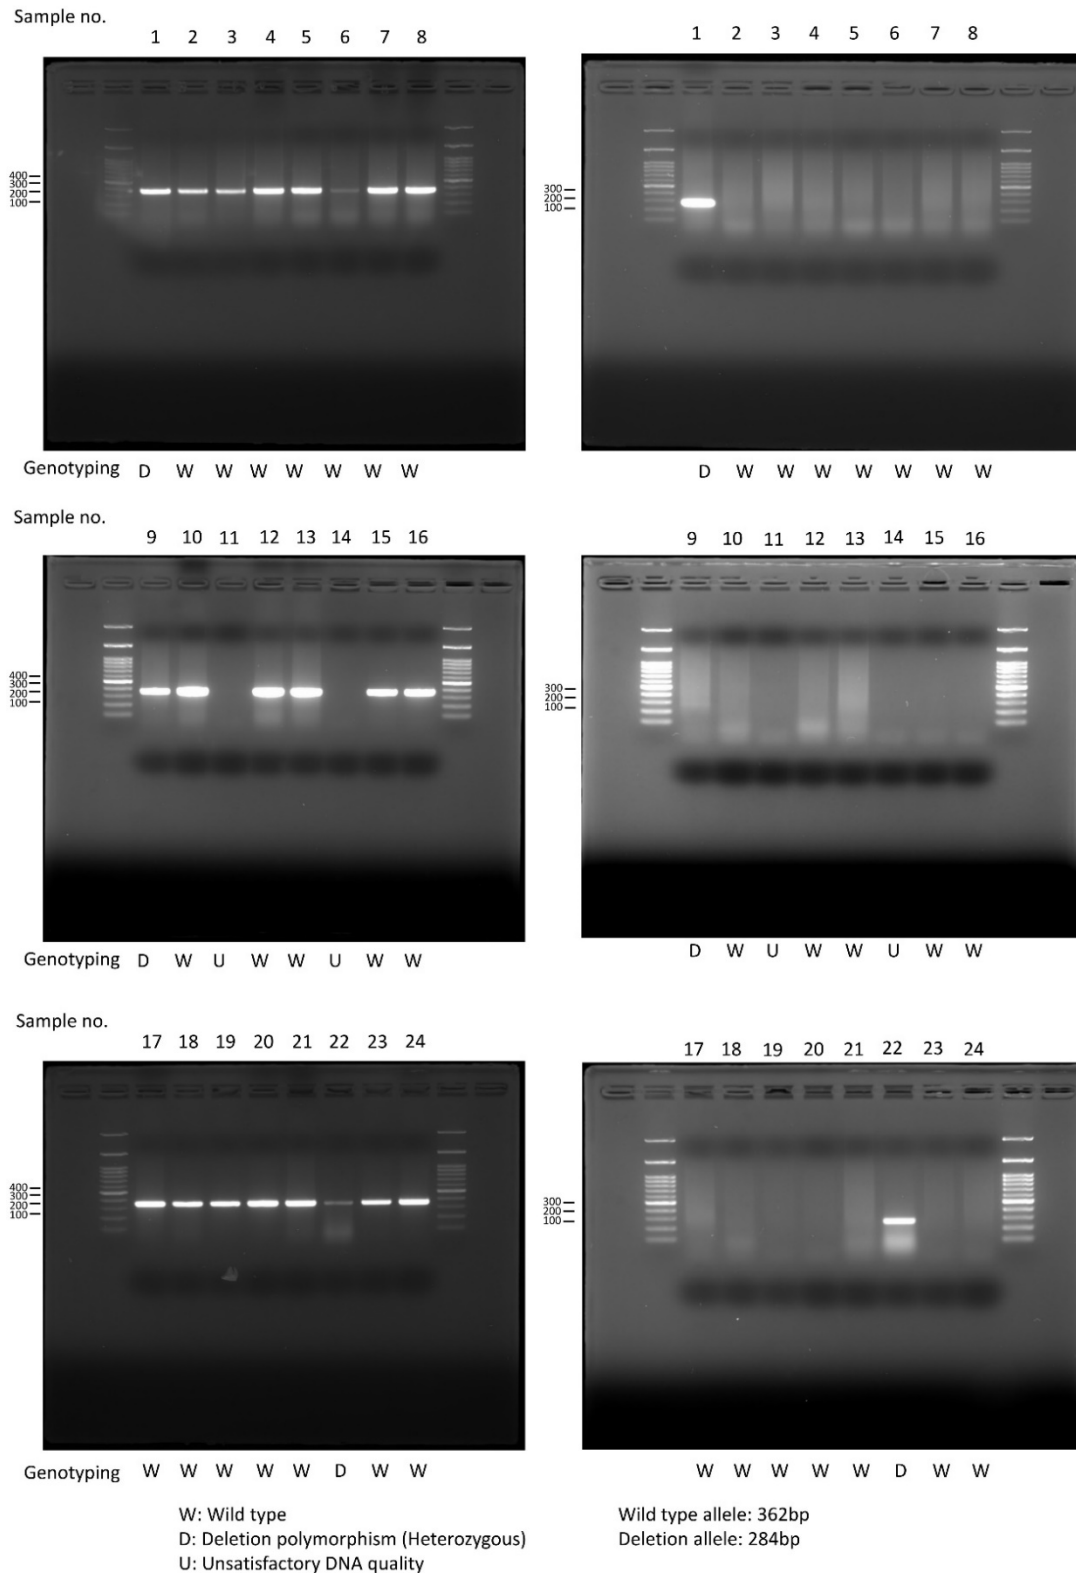

**Supplementary Figure 4.** Agarose gel images of the PCR products from wild type and BIM deletion alleles. The left side gels analyze the PCR product with wild-type primer, whereas the right side gels analyzed the PCR product with deletion primer.

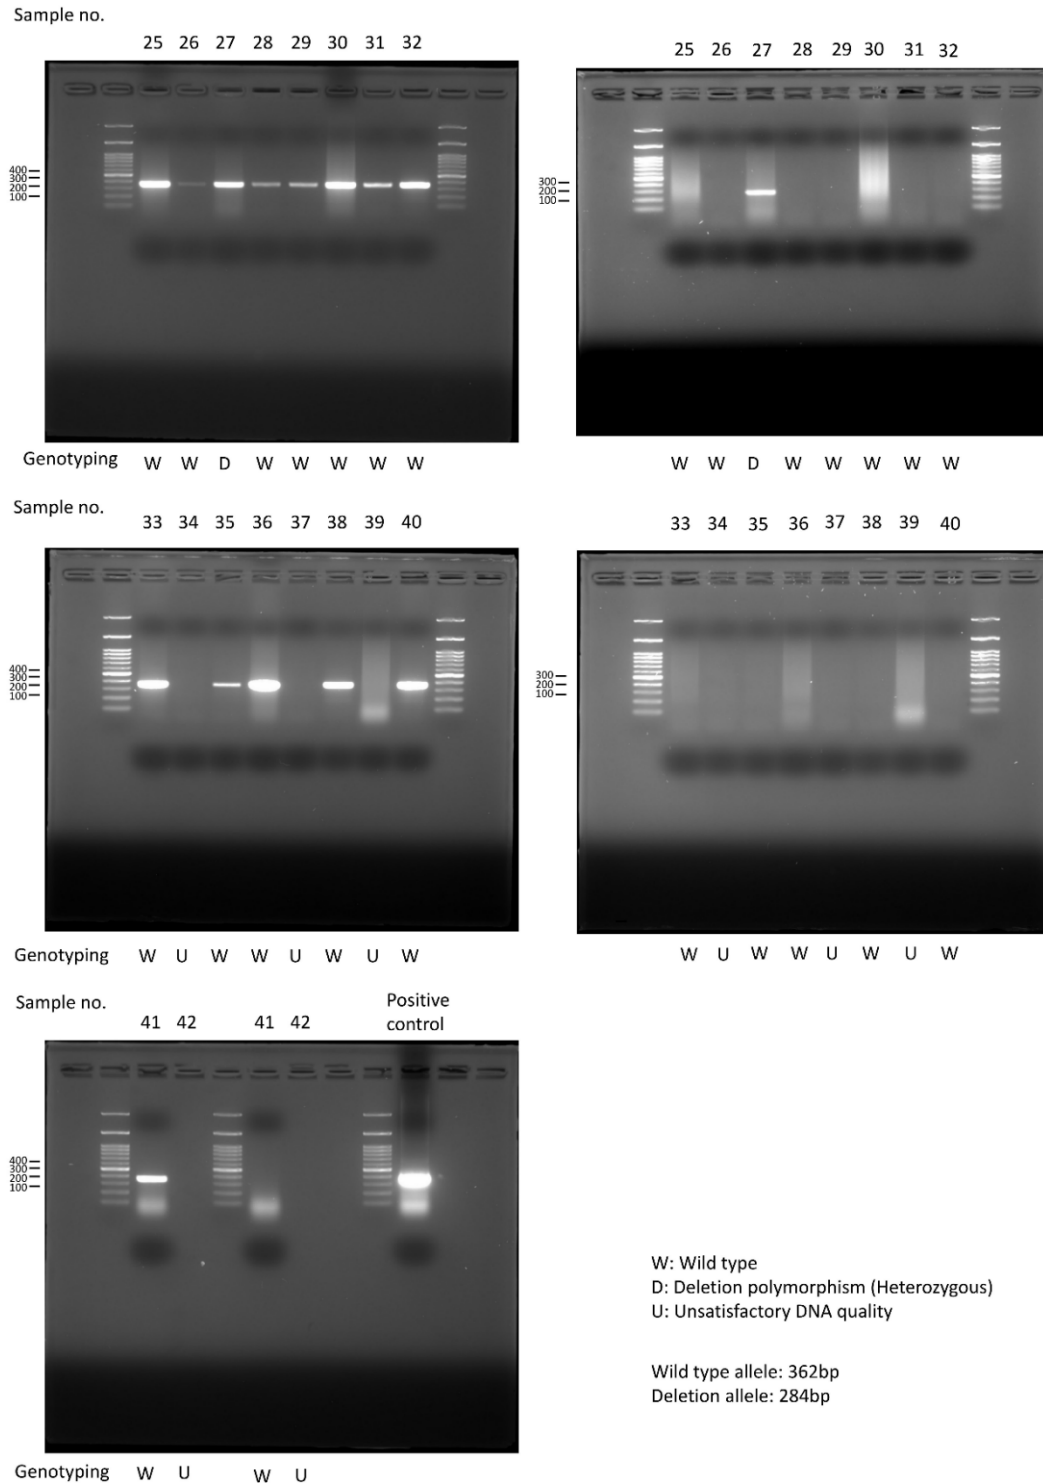

**Supplementary Figure 4 (cont.).** Agarose gel images of the PCR products from wild type and BIM deletion alleles. The left side gels analyze the PCR product with wild-type primer, whereas the right side gels analyzed the PCR product with deletion primer.
